# Supplementary material for: Evolution of the neuraminidase gene of seasonal influenza A and B viruses in Thailand between 2010 and 2015
Source: PubMed Central journal article supplement (PMC5391933; doi:10.1371/journal.pone.0175655), 2017-04-14
Supplement: pone.0175655.s004.pdf [file pone.0175655.s004.pdf]

**S1 Table. The accession numbers of neuraminidase sequences were used in present study**

**Influenza A(H3N2)**

| <b>Virus name</b>          | <b>Accession number</b> |
|----------------------------|-------------------------|
| A/California/7/2004        | EPI367106               |
| A/Wisconsin/67/2005        | EPI160220               |
| A/Brisbane/10/2007         | EPI165491               |
| A/Perth/16/2009            | EPI182942               |
| A/Victoria/361/2011        | EPI353905               |
| A/Switzerland/9715293/2013 | EPI540525               |
| A/Moscow/10/99             | EPI103336               |
| A/Panama/2007/1999         | DQ487337                |
| A/Beijing/353/1989         | DQ508835                |
| A/Beijing/32/1992          | CY033608                |
| A/England/42/1972          | CY113087                |
| A/Fujian/411/2002          | CY088485                |
| A/Hong Kong/1/1968         | CY112251                |
| A/Sichuan/2/1987           | CY112398                |
| A/Sydney/5/1997            | CY112887                |
| A/Texas/1/1977             | CY113263                |
| A/Victoria/3/1975          | CY113183                |
| A/Wuhan/359/1995           | CY112823                |
| A/Wellington/01/2004       | CY012106                |
| A/Israel/1/11/2011         | EPI319251               |
| A/Norway/1330/2010         | EPI302230               |
| A/Stockholm/18/2011        | EPI318273               |
| A/England/259/2011         | EPI346608               |
| A/Texas/50/2012            | KC892237                |
| A/Hong Kong/146/2013       | EPI426062               |
| A/Ireland/M28390/2013      | EPI467995               |
| A/Hong Kong/4801/2014      | EPI539577               |
| A/Samara/73/2013           | EPI460559               |
| A/Newcastle/22/2014        | EPI541460               |
| A/Madagascar/0648/2011     | EPI319277               |
| A/Serbia/71/2011           | EPI326116               |
| A/Alabama/05/2010          | KC535442                |
| A/Iowa/19/2010             | KC882859                |
| A/Minnesota/10/2012        | KC892316                |
| A/Victoria/208/2009        | EPI232452               |
| A/Bangkok/1/1979           | CY121002                |

|                        |          |
|------------------------|----------|
| A/Bangkok/SI-MI01/2015 | KP877373 |
| A/Bangkok/SI-MI02/2015 | KP877374 |
| A/Bangkok/SI-MI03/2015 | KP877375 |
| A/Bangkok/SI-MI04/2015 | KP877376 |
| A/Bangkok/SI-MI05/2014 | KP877377 |
| A/Bangkok/SI-MI06/2014 | KP877378 |
| A/Bangkok/SI-MI07/2014 | KP877379 |
| A/Bangkok/SI-MI08/2014 | KP877380 |
| A/Bangkok/SI-MI09/2014 | KP877381 |
| A/Bangkok/SI-MI10/2014 | KP877382 |
| A/Bangkok/SI-MI11/2014 | KP877383 |
| A/Bangkok/SI-MI12/2014 | KP877384 |
| A/Bangkok/SI-MI13/2014 | KP877385 |
| A/Bangkok/SI-MI14/2014 | KP877386 |
| A/Bangkok/SI-MI15/2014 | KP877387 |
| A/Bangkok/SI-MI16/2014 | KP877388 |
| A/Bangkok/SI-MI17/2014 | KP877389 |
| A/Bangkok/SI-MI18/2014 | KP877390 |
| A/Bangkok/SI-MI19/2014 | KP877391 |
| A/Bangkok/SI-MI20/2014 | KP877392 |
| A/Bangkok/SI-MI21/2015 | KP877393 |
| A/Bangkok/SI-MI22/2015 | KP877394 |
| A/Bangkok/SI-MI23/2015 | KP877395 |
| A/Bangkok/SI-MI24/2015 | KP877396 |
| A/Bangkok/SI-MI25/2015 | KP877397 |
| A/Bangkok/SI-MI26/2015 | KP877398 |
| A/Bangkok/SI-MI27/2015 | KP877399 |
| A/Bangkok/SI-MI28/2015 | KP877400 |
| A/Bangkok/SI-MI29/2015 | KP877401 |
| A/Bangkok/SI-MI30/2015 | KP877402 |
| A/Bangkok/SI-MI31/2015 | KP877403 |
| A/Bangkok/SI-MI32/2015 | KP877404 |
| A/Thailand/173/2007    | AB501496 |
| A/Thailand/308/2008    | AB501490 |
| A/Thailand/315/2008    | AB501497 |
| A/Thailand/322/2008    | AB501493 |
| A/Thailand/340/2007    | AB501499 |
| A/Thailand/380/2007    | AB501503 |
| A/Thailand/381/2007    | AB501504 |
| A/Thailand/429/2007    | AB501506 |
| A/Thailand/447/2008    | AB501491 |

|                           |          |
|---------------------------|----------|
| A/Thailand/461/2007       | AB501507 |
| A/Thailand/515/2008       | AB501487 |
| A/Thailand/536/2008       | AB501498 |
| A/Thailand/545/2008       | AB501488 |
| A/Thailand/764/2008       | AB501508 |
| A/Thailand/CU-1101/2008   | EU625366 |
| A/Thailand/CU-1102/2008   | EU625367 |
| A/Thailand/CU-1103/2008   | EU625368 |
| A/Thailand/CU-A114/2013   | KP336092 |
| A/Thailand/CU-A134/2013   | KP336094 |
| A/Thailand/CU-A153/2013   | KP336095 |
| A/Thailand/CU-A164/2013   | KP336097 |
| A/Thailand/CU-A166/2013   | KP336096 |
| A/Thailand/CU-A182/2013   | KP336099 |
| A/Thailand/CU-A196/2013   | KP336098 |
| A/Thailand/CU-A24/2013    | KP336091 |
| A/Thailand/CU-A305/2013   | KP336103 |
| A/Thailand/CU-A411/2013   | KP336112 |
| A/Thailand/CU-A459/2013   | KP336114 |
| A/Thailand/CU-A598/2014   | KP336121 |
| A/Thailand/CU-A7/2013     | KP336090 |
| A/Thailand/CU-B10282/2014 | KP336134 |
| A/Thailand/CU-B10283/2014 | KP336133 |
| A/Thailand/CU-B10345/2014 | KP336136 |
| A/Thailand/CU-B10421/2014 | KP336137 |
| A/Thailand/CU-B10422/2014 | KP336138 |
| A/Thailand/CU-B10509/2014 | KP336139 |
| A/Thailand/CU-B10520/2014 | KP336141 |
| A/Thailand/CU-B10521/2014 | KP336140 |
| A/Thailand/CU-B10557/2014 | KP336142 |
| A/Thailand/CU-B106/2009   | GQ983550 |
| A/Thailand/CU-B10755/2014 | KP336144 |
| A/Thailand/CU-B10792/2014 | KP336145 |
| A/Thailand/CU-B10828/2014 | KP336146 |
| A/Thailand/CU-B10952/2014 | KP336147 |
| A/Thailand/CU-B10975/2014 | KP336148 |
| A/Thailand/CU-B110/2009   | GQ902811 |
| A/Thailand/CU-B11055/2014 | KP336149 |
| A/Thailand/CU-B11065/2014 | KP336150 |
| A/Thailand/CU-B11201/2014 | KP336151 |
| A/Thailand/CU-B11202/2014 | KP336152 |

|                           |          |
|---------------------------|----------|
| A/Thailand/CU-B11284/2014 | KP336154 |
| A/Thailand/CU-B11351/2014 | KP336155 |
| A/Thailand/CU-B11367/2014 | KP336156 |
| A/Thailand/CU-B1672/2009  | GU271976 |
| A/Thailand/CU-B1697/2009  | GU271984 |
| A/Thailand/CU-B4/2009     | GQ902795 |
| A/Thailand/CU-B4730/2011  | KP336040 |
| A/Thailand/CU-B4836/2011  | KP336044 |
| A/Thailand/CU-B4844/2011  | KP336042 |
| A/Thailand/CU-B4929/2011  | KP336045 |
| A/Thailand/CU-B5021/2011  | KP336046 |
| A/Thailand/CU-B5105/2011  | KP336047 |
| A/Thailand/CU-B5436/2011  | KP336049 |
| A/Thailand/CU-B5465/2011  | KP336050 |
| A/Thailand/CU-B5541/2011  | KP336051 |
| A/Thailand/CU-B5593/2011  | KP336053 |
| A/Thailand/CU-B5614/2011  | KP336052 |
| A/Thailand/CU-B5697/2011  | KP336054 |
| A/Thailand/CU-B5735/2011  | KP336055 |
| A/Thailand/CU-B5773/2011  | KP336056 |
| A/Thailand/CU-B5848/2011  | KP336057 |
| A/Thailand/CU-B5873/2011  | KP336058 |
| A/Thailand/CU-B590/2009   | GQ902819 |
| A/Thailand/CU-B5900/2011  | KP336059 |
| A/Thailand/CU-B5909/2011  | KP336060 |
| A/Thailand/CU-B5928/2011  | KP336061 |
| A/Thailand/CU-B6091/2012  | KP336064 |
| A/Thailand/CU-B6251/2012  | KP336065 |
| A/Thailand/CU-B6274/2012  | KP336066 |
| A/Thailand/CU-B6309/2012  | KP336067 |
| A/Thailand/CU-B657/2009   | GQ902827 |
| A/Thailand/CU-B6780/2012  | KP336068 |
| A/Thailand/CU-B6936/2012  | KP336070 |
| A/Thailand/CU-B7189/2012  | KP336074 |
| A/Thailand/CU-B7235/2012  | KP336076 |
| A/Thailand/CU-B7269/2012  | KP336077 |
| A/Thailand/CU-B7367/2012  | KP336078 |
| A/Thailand/CU-B7418/2013  | KP336079 |
| A/Thailand/CU-B7483/2013  | KP336080 |
| A/Thailand/CU-B7536/2013  | KP336081 |
| A/Thailand/CU-B7585/2013  | KP336082 |

|                          |          |
|--------------------------|----------|
| A/Thailand/CU-B7596/2013 | KP336083 |
| A/Thailand/CU-B7646/2013 | KP336084 |
| A/Thailand/CU-B7755/2013 | KP336085 |
| A/Thailand/CU-B7765/2013 | KP336086 |
| A/Thailand/CU-B7853/2013 | KP336087 |
| A/Thailand/CU-B7885/2013 | KP336088 |
| A/Thailand/CU-B7937/2013 | KP336089 |
| A/Thailand/CU-B7992/2013 | KP336093 |
| A/Thailand/CU-B8121/2013 | KP336100 |
| A/Thailand/CU-B8127/2013 | KP336101 |
| A/Thailand/CU-B8134/2013 | KP336102 |
| A/Thailand/CU-B8222/2013 | KP336104 |
| A/Thailand/CU-B8235/2013 | KP336106 |
| A/Thailand/CU-B8236/2013 | KP336107 |
| A/Thailand/CU-B8364/2013 | KP336108 |
| A/Thailand/CU-B8518/2013 | KP336109 |
| A/Thailand/CU-B8525/2013 | KP336110 |
| A/Thailand/CU-B8736/2013 | KP336115 |
| A/Thailand/CU-B8745/2013 | KP336116 |
| A/Thailand/CU-B8772/2013 | KP336118 |
| A/Thailand/CU-B8849/2014 | KP336122 |
| A/Thailand/CU-C2417/2011 | KP336062 |
| A/Thailand/CU-C4087/2013 | KP336105 |
| A/Thailand/CU-C4364/2013 | KP336120 |
| A/Thailand/CU-C4406/2014 | KP336123 |
| A/Thailand/CU-C4492/2014 | KP336124 |
| A/Thailand/CU-C4507/2014 | KP336126 |
| A/Thailand/CU-C4546/2014 | KP336127 |
| A/Thailand/CU-C4655/2014 | KP336132 |
| A/Thailand/CU-CB166/2014 | KP336131 |
| A/Thailand/CU-H1071/2009 | CY074944 |
| A/Thailand/CU-H1285/2010 | CY074952 |
| A/Thailand/CU-H1443/2010 | CY074960 |
| A/Thailand/CU-H16/2009   | GU271992 |
| A/Thailand/CU-H1817/2010 | CY074968 |
| A/Thailand/CU-H2973/2011 | KP336041 |
| A/Thailand/CU-H2989/2011 | KP336043 |
| A/Thailand/CU-H3020/2011 | KP336048 |
| A/Thailand/CU-H3141/2012 | KP336063 |
| A/Thailand/CU-H3368/2012 | KP336069 |
| A/Thailand/CU-H3434/2012 | KP336071 |

|                            |           |
|----------------------------|-----------|
| A/Thailand/CU-H3435/2012   | KP336072  |
| A/Thailand/CU-H3453/2012   | KP336073  |
| A/Thailand/CU-H3490/2012   | KP336075  |
| A/Thailand/CU-H3567/2013   | KP336111  |
| A/Thailand/CU-H3574/2013   | KP336113  |
| A/Thailand/CU-H3580/2013   | KP336117  |
| A/Thailand/CU-H3584/2013   | KP336119  |
| A/Thailand/CU-H3595/2014   | KP336125  |
| A/Thailand/CU-H3611/2014   | KP336128  |
| A/Thailand/CU-H3624/2014   | KP336129  |
| A/Thailand/CU-H3626/2014   | KP336130  |
| A/Thailand/CU-H3649/2014   | KP336135  |
| A/Thailand/CU-H3656/2014   | KP336143  |
| A/Thailand/CU-H3680/2014   | KP336153  |
| A/Thailand/CU-124/2006     | EU021285  |
| A/Thailand/CU-228/2006     | EU021275  |
| A/Thailand/CU-231/2006     | EU021283  |
| A/Thailand/CU-259/2006     | EU021279  |
| A/Thailand/CU-260/2006     | EU021281  |
| A/Thailand/CU-272/2007     | EU021271  |
| A/Thailand/CU-280/2007     | EU021273  |
| A/Thailand/CU-282/2007     | EU021277  |
| A/Thailand/CU-356/2008     | FJ912978  |
| A/Thailand/CU-370/2008     | FJ912986  |
| A/Thailand/CU-379/2008     | FJ912994  |
| A/Thailand/CU-46/2006      | EU021269  |
| A/Thailand/Siriraj/02/2003 | JN617983  |
| A/Thailand/Siriraj/03/2004 | JN617986  |
| A/Thailand/Siriraj/06/2002 | JN617984  |
| A/Thailand/Siriraj/08/1998 | JN617985  |
| A/Thailand/VIROAF1/2012    | KJ577151  |
| A/Thailand/VIROAF1CS/2012  | KJ848676  |
| A/Thailand/VIROAF2/2012    | KJ577159  |
| A/Thailand/VIROAF6/2012    | KJ577191  |
| A/Bangkok/122/94           | U43426    |
| A/Siriraj/ICRC/NKS/1/2011  | EPI670324 |
| A/Tak/150/2015             | EPI652271 |
| A/Chanthaburi/13/2015      | EPI652262 |
| A/Nonthaburi/4/2015        | EPI652256 |
| A/Chanthaburi/49/2015      | EPI649730 |
| A/Bangkok/44/2015          | EPI649660 |

|                              |           |
|------------------------------|-----------|
| A/Chanthaburi/41/2015        | EPI649642 |
| A/Bangkok/43/2015            | EPI649619 |
| A/Chanthaburi/40/2015        | EPI649556 |
| A/Chanthaburi/46/2015        | EPI649548 |
| A/Nakhonratchaisima/35/2015  | EPI649505 |
| A/Prachuapkhirikhan/289/2015 | EPI649489 |
| A/Nonthaburi/345/2015        | EPI647891 |
| A/Nonthaburi/340/2015        | EPI647883 |
| A/Rayong/335/2015            | EPI647875 |
| A/Nonthaburi/333/2015        | EPI647859 |
| A/Nong Khai/218/2013         | EPI587902 |
| A/Phuket/186/2013            | EPI587901 |
| A/Chanthaburi/179/2013       | EPI587900 |
| A/Tak/166/2013               | EPI587899 |
| A/Chiang Rai/164/2013        | EPI587897 |
| A/Bangkok/126/2013           | EPI587896 |
| A/NongKhai/185/2014          | EPI567266 |
| A/Chanthaburi/2419/2014      | EPI566016 |
| A/Nonthaburi/2421/2014       | EPI565992 |
| A/Nonthaburi/01/2015         | EPI564286 |
| A/Chanthaburi/170/2013       | EPI553214 |
| A/Phuket/342/2013            | EPI553203 |
| A/Tak/1845/2014              | EPI545580 |
| A/Nonthaburi/302/2014        | EPI543716 |
| A/Chanthaburi/301/2014       | EPI543707 |
| A/CHIANGRAI/186/2014         | EPI541336 |
| A/SONGKHLA/3076/2013         | EPI529586 |
| A/NONTHABURI/3027/2013       | EPI529570 |
| A/CHIANGRAI/337/2013         | EPI529567 |
| A/NONGKHAI/321/2013          | EPI529559 |
| A/BANGKOK/3489/2012          | EPI526660 |
| A/Prachuapkhirikhan/137/2014 | EPI520396 |
| A/Prachuapkhirikhan/163/2014 | EPI520358 |
| A/SongKhla/117/2014          | EPI516707 |
| A/ChiangRai/114/2014         | EPI516704 |
| A/Phuket/186/2013            | EPI467241 |
| A/Kamphaengphet/175/2013     | EPI466932 |
| A/Nonthaburi/174/2013        | EPI466923 |
| A/PRACHUAPKHIRIKHAN/408/2012 | EPI450270 |
| A/PHUKET/407/2012            | EPI450267 |
| A/Nonthanuri/456/2012        | EPI432651 |

|                              |           |
|------------------------------|-----------|
| A/Nonthaburi/263/2013        | EPI432622 |
| A/Prachuapkhirikhan/328/2012 | EPI406056 |
| A/Chanthaburi/324/2012       | EPI406047 |
| A/NONTHABURI/42/2012         | EPI379390 |
| A/SONGKHLA/8/2012            | EPI379384 |
| A/ChiangRai/277/2011         | EPI348477 |
| A/Nonthaburi/279/2011        | EPI346457 |
| A/ChiangRai/277/2011         | EPI346454 |
| A/Chonburi/269/2011          | EPI346451 |
| A/NONTHABURI/110/2011        | EPI346319 |
| A/CHIANGRAI/108/2011         | EPI346316 |
| A/CHIANGRAI/21/2011          | EPI331593 |
| A/SURATTHANI/23/2011         | EPI331542 |
| A/Thailand/911/2010          | EPI295270 |
| A/NOTHABURI/488/2010         | EPI294227 |
| A/Nonthaburi/342/2010        | EPI278795 |
| A/SURATTHANI/269/2010        | EPI272024 |
| A/SURATTHANI/116/2010        | EPI272018 |
| A/Bangkok/561/2009           | EPI232664 |
| A/Thailand/419/2009          | EPI232622 |
| A/Thailand/18/2009           | EPI232619 |
| A/Thailand/0316/2009         | EPI232616 |
| A/Thailand/01/2009           | EPI232613 |
| A/Tak/527/2009               | EPI232607 |
| A/SuratThani/559/2009        | EPI232601 |
| A/NongKhai/560/2009          | EPI232584 |
| A/BANGKOK/132/2009           | EPI228245 |
| A/SURATTHANI/72/2009         | EPI211733 |
| A/Thailand/981/2008          | EPI185822 |
| A/Thailand/947/2008          | EPI185821 |
| A/Thailand/860/2008          | EPI185819 |
| A/Thailand/998/2008          | EPI175304 |
| A/Thailand/944/2008          | EPI175299 |
| A/Thailand/419/2008          | EPI163138 |
| A/Thailand/356/2008          | EPI163136 |
| A/Thailand/786/2007          | EPI162314 |
| A/Thailand/677/2007          | EPI162302 |
| A/Thailand/284/2007          | EPI162299 |
| A/Thailand/271/2007          | EPI162296 |
| A/Thailand/786/2007          | EPI158244 |
| A/Thailand/677/2007          | EPI158232 |

|                           |           |
|---------------------------|-----------|
| A/Thailand/284/2007       | EPI158223 |
| A/Thailand/271/2007       | EPI158220 |
| A/Thailand/359/2007       | EPI155714 |
| A/THAILAND/656/2006       | EPI155273 |
| A/THAILAND/650/2006       | EPI155271 |
| A/THAILAND/707/2006       | EPI155260 |
| A/THAILAND/697/2006       | EPI155256 |
| A/THAILAND/692/2006       | EPI155254 |
| A/THAILAND/625/2006       | EPI155250 |
| A/THAILAND/618/2006       | EPI155248 |
| A/THAILAND/559/2006       | EPI155246 |
| A/Thailand/553/2006       | EPI155244 |
| A/THAILAND/558/2006       | EPI155242 |
| A/THAILAND/475/2006       | EPI155240 |
| A/Thailand/CU-B11417/2014 | KX151186  |
| A/Thailand/CU-B11444/2014 | KX151187  |
| A/Thailand/CU-B11461/2015 | KX151188  |
| A/Thailand/CU-B11507/2015 | KX151189  |
| A/Thailand/CU-B11518/2915 | KX151190  |
| A/Thailand/CU-A1402/2015  | KX151191  |
| A/Thailand/CU-B11566/2015 | KX151192  |
| A/Thailand/CU-B11585/2015 | KX151193  |
| A/Thailand/CU-C5500/2015  | KX151194  |
| A/Thailand/CU-A1513/2015  | KX151195  |
| A/Thailand/CU-H3689/2015  | KX151196  |
| A/Thailand/CU-C5572/2015  | KX151197  |
| A/Thailand/CU-B11686/2015 | KX151198  |
| A/Thailand/CU-B11703/2015 | KX151199  |
| A/Thailand/CU-B11773/2015 | KX151200  |
| A/Thailand/CU-B11807/2015 | KX151201  |
| A/Thailand/CU-B11820/2015 | KX151202  |
| A/Thailand/CU-B11843/2015 | KX151203  |
| A/Thailand/CU-B11870/2015 | KX151204  |
| A/Thailand/CU-B11889/2015 | KX151205  |
| A/Thailand/CU-B11935/2015 | KX151206  |
| A/Thailand/CU-B11968/2015 | KX151207  |
| A/Thailand/CU-H3700/2015  | KX151208  |
| A/Thailand/CU-B12006/2015 | KX151209  |
| A/Thailand/CU-B12034/2015 | KX151210  |
| A/Thailand/CU-B12069/2015 | KX151211  |
| A/Thailand/CU-B12081/2015 | KX151212  |

|                           |          |
|---------------------------|----------|
| A/Thailand/CU-B12139/2015 | KX151213 |
| A/Thailand/CU-H3708/2015  | KX151214 |
| A/Thailand/CU-C5942/2015  | KX151215 |
| A/Thailand/CU-B12191/2015 | KX151216 |
| A/Thailand/CU-B12415/2015 | KX151217 |
| A/Thailand/CU-B12589/2015 | KX151218 |
| A/Thailand/CU-B12644/2015 | KX151219 |
| A/Thailand/CU-C6062/2015  | KX151220 |
| A/Thailand/CU-B12788/2015 | KX151221 |
| A/Thailand/CU-B12888/2015 | KX151222 |
| A/Thailand/CU-B13425/2015 | KX151223 |
| A/Thailand/CU-C6193/2015  | KX151224 |
| A/Thailand/CU-C6246/2015  | KX151225 |
| A/Thailand/CU-B13893/2015 | KX151226 |

### **Influenza A(H1N1)**

| <b>Virus name</b>        | <b>Accession number</b> |
|--------------------------|-------------------------|
| A/NewCaledonia/20/1999   | CY033624                |
| A/Denmark/16/2004        | EU097726                |
| A/England/493/2006       | FJ445052                |
| A/Denmark/49/2006        | EU097736                |
| A/Denmark/50/2006        | EU097737                |
| A/Norway/2289/2006       | EPI509388               |
| A/Thailand/CU41/2006     | EU021247                |
| A/Solomon Islands/3/2006 | EPI509400               |
| A/StPetersburg/8/2006    | CY035128                |
| A/Thailand/CU75/2006     | EU021263                |
| A/Guangzhou/1561/2006    | EU382993                |
| A/Guangzhou/483/2006     | EU382988                |
| A/Guangzhou/555/2006     | EU382990                |
| A/Cambodia/365/2007      | EPI157505               |
| A/Hawaii/38/2007         | EU516270                |
| A/Oregon/07/2007         | EU516285                |
| A/Hawaii/46/2007         | EU779656                |
| A/California/06/2008     | GQ475837                |
| A/Gunma/07G002/2008      | CY043411                |
| A/Denmark/47/2006        | EU097731                |
| A/England/594/2006       | FJ445066                |
| A/Niigata/F95/2007       | CY094798                |

|                      |           |
|----------------------|-----------|
| A/Brisbane/59/2007   | CY058489  |
| A/Tottori/52/2008    | CY075491  |
| A/Hawaii/17/2009     | EPI189495 |
| A/Bangkok/163/2000   | CY125110  |
| A/Thailand/1035/2008 | GQ423407  |
| A/Thailand/309/2008  | AB501444  |
| A/Thailand/328/2006  | AB501445  |
| A/Thailand/331/2006  | AB501446  |
| A/Thailand/332/2006  | AB501448  |
| A/Thailand/332/2008  | AB501447  |
| A/Thailand/334/2006  | AB501449  |
| A/Thailand/336/2006  | AB501450  |
| A/Thailand/337/2006  | AB501451  |
| A/Thailand/344/2006  | AB501452  |
| A/Thailand/348/2006  | AB501453  |
| A/Thailand/364/2006  | AB501454  |
| A/Thailand/385/2006  | AB501455  |
| A/Thailand/386/2006  | AB501456  |
| A/Thailand/387/2006  | AB501457  |
| A/Thailand/388/2006  | AB501458  |
| A/Thailand/390/2006  | AB501459  |
| A/Thailand/391/2006  | AB501460  |
| A/Thailand/392/2006  | AB501461  |
| A/Thailand/393/2006  | AB501462  |
| A/Thailand/395/2006  | AB501463  |
| A/Thailand/396/2006  | AB501464  |
| A/Thailand/397/2006  | AB501465  |
| A/Thailand/398/2006  | AB501466  |
| A/Thailand/399/2006  | AB501467  |
| A/Thailand/400/2006  | AB501468  |
| A/Thailand/401/2006  | AB501469  |
| A/Thailand/402/2006  | AB501470  |
| A/Thailand/403/2006  | AB501471  |
| A/Thailand/404/2006  | AB501472  |
| A/Thailand/423/2006  | AB501473  |
| A/Thailand/424/2006  | AB501474  |
| A/Thailand/425/2006  | AB501475  |
| A/Thailand/469/2008  | AB501476  |
| A/Thailand/496/2008  | AB501477  |
| A/Thailand/500/2007  | AB501478  |
| A/Thailand/501/2007  | AB501479  |

|                               |            |
|-------------------------------|------------|
| A/Thailand/530/2008           | AB501480   |
| A/Thailand/56/2008            | AB501481   |
| A/Thailand/669/2008           | AB526260   |
| A/Thailand/708/2006           | EU879083   |
| A/Thailand/72/2006            | AB501482   |
| A/Thailand/76/2006            | AB501483   |
| A/Thailand/778/2008           | AB501484   |
| A/Thailand/829/2008           | AB501485   |
| A/Thailand/839/2008           | AB501486   |
| A/Thailand/CU32/2006          | EU021265   |
| A/Thailand/CU41/2006          | EU021247   |
| A/Thailand/CU44/2006          | EU021259   |
| A/Thailand/CU51/2006          | EU021255   |
| A/Thailand/CU53/2006          | EU021249   |
| A/Thailand/CU57/2006          | EU021257   |
| A/Thailand/CU67/2006          | EU021251   |
| A/Thailand/CU68/2006          | EU021261   |
| A/Thailand/CU75/2006          | EU021263   |
| A/Thailand/CU88/2006          | EU021253   |
| A/Thailand/SirirajRamaTT/2004 | JN676133   |
| A/Thailand/CU-H223/2009       | GU183817   |
| A/Thailand/CU-H565/2009       | GU271968   |
| A/Thailand/Siriraj/3043/2009  | JN676131   |
| A/Thailand/CU-B589/2009       | GU183801   |
| A/Thailand/CU-B685/2009       | GU183809   |
| A/Thailand/CU-B97/2009        | GU271952   |
| A/Thailand/CU-H17/2009        | GQ902835   |
| A/Thailand/CU-B267/2009       | GU271960   |
| A/Thailand/CU-B42/2009        | GQ902803   |
| A/Thailand/874/2008           | EPI232891  |
| A/Thailand/1026/2008          | EPI232890  |
| A/Tak/427/2009                | EPI232888  |
| A/CHANTHABURI/341/2009        | EPI228273  |
| A/SURAT THANI/337/2009        | EPI228257  |
| A/TAK/334/2009                | EPI 228255 |
| A/Thailand/1037/2008          | EPI189736  |
| A/Thailand/381/2008           | EPI163216  |
| A/Thailand/380/2008           | EPI163061  |
| A/Thailand/375/2008           | EPI163059  |
| A/Thailand/358/2008           | EPI163057  |
| A/Thailand/777/2007           | EPI158238  |

|                         |           |
|-------------------------|-----------|
| A/Thailand/767/2007     | EPI158236 |
| A/Thailand/711/2007     | EPI158234 |
| A/Thailand/1577/2007    | EPI158217 |
| A/Suphanburi/2131/2004  | EPI158162 |
| A/Suphanburi/2130/2004  | EPI158161 |
| A/Suphanburi/2129/2004  | EPI158160 |
| A/Sakaew/2132/2004      | EPI158099 |
| A/Ratchaburi/1847/2004  | EPI158089 |
| A/Prachinburi/1817/2004 | EPI158082 |
| A/Prachinburi/1749/2004 | EPI158080 |
| A/Nonthaburi/1739/2004  | EPI158031 |
| A/Nonthaburi/1738/2004  | EPI158029 |
| A/Bangkok/1876/2004     | EPI157428 |
| A/Bangkok/1822/2004     | EPI157427 |
| A/Bangkok/1759/2004     | EPI157426 |
| A/Bangkok/1757/2004     | EPI157425 |
| A/Bangkok/1755/2004     | EPI157424 |
| A/Bangkok/1752/2004     | EPI157423 |
| A/Bangkok/1742/2004     | EPI157422 |
| A/Bangkok/1741/2004     | EPI157421 |
| A/Bangkok/1724/2004     | EPI157420 |
| A/Bangkok/1699/2004     | EPI157419 |
| A/Bangkok/1544/2004     | EPI157418 |
| A/Bangkok/1507/2004     | EPI157416 |
| A/Bangkok/1498/2004     | EPI157415 |
| A/Bangkok/1468/2004     | EPI157414 |
| A/Bangkok/1467/2004     | EPI157413 |
| A/Bangkok/1410/2004     | EPI157412 |
| A/Bangkok/1406/2004     | EPI157411 |
| A/Ayutthaya/1720/2004   | EPI157410 |
| A/Ayutthaya/2111/2004   | EPI157408 |
| A/Thailand/689/2006     | EPI155285 |
| A/Thailand/677/2006     | EPI155283 |
| A/Thailand/580/2006     | EPI155281 |
| A/Thailand/676/2006     | EPI155279 |
| A/Thailand/672/2006     | EPI155277 |
| A/Thailand/674/2006     | EPI155275 |
| A/Thailand/717/2006     | EPI155268 |
| A/Thailand/718/2006     | EPI155266 |

## Influenza A(H1N1)pdm09

| <b>Virus name</b>         | <b>Accession number</b> |
|---------------------------|-------------------------|
| A/California/07/2009      | FJ984386                |
| A/CzechRepublic/32/2011   | EPI319448               |
| A/HongKong/3934/2011      | EPI326207               |
| A/Christchurch/16/2010    | EPI280343               |
| A/Astrakhan/1/2011        | EPI319591               |
| A/HongKong/5659/2012      | EPI382425               |
| A/SouthAfrica/3626/2013   | EPI466627               |
| A/Dakar/02/2014           | EPI539471               |
| A/Ghana/DARI/0095/2014    | EPI541030               |
| A/StPetersburg/100/2011   | EPI316434               |
| A/Thailand/CU-B4656/2011  | KX151227                |
| A/Thailand/CU-B4662/2011  | KX151228                |
| A/Thailand/CU-B4717/2011  | KX151229                |
| A/Thailand/CU-B4773/2011  | KX151230                |
| A/Thailand/CU-B5356/2011  | KX151231                |
| A/Thailand/CU-B5515/2011  | KX151232                |
| A/Thailand/CU-B6475/2012  | KX151233                |
| A/Thailand/CU-B6609/2012  | KX151234                |
| A/Thailand/CU-B6801/2012  | KX151235                |
| A/Thailand/CU-B8091/2013  | KX151236                |
| A/Thailand/CU-B8092/2013  | KX151237                |
| A/Thailand/CU-B8250/2013  | KX151238                |
| A/Thailand/CU-A338/2013   | KX151239                |
| A/Thailand/CU-B8573/2013  | KX151240                |
| A/Thailand/CU-B8665/2013  | KX151241                |
| A/Thailand/CU-B8730/2013  | KX151242                |
| A/Thailand/CU-B8906/2014  | KX151243                |
| A/Thailand/CU-B8908/2014  | KX151244                |
| A/Thailand/CU-B8981/2014  | KX151245                |
| A/Thailand/CU-B8982/2014  | KX151246                |
| A/Thailand/CU-B9024/2014  | KX151247                |
| A/Thailand/CU-B9037/2014  | KX151248                |
| A/Thailand/CU-B9221/2014  | KX151249                |
| A/Thailand/CU-B9225/2014  | KX151250                |
| A/Thailand/CU-B9433/2014  | KX151251                |
| A/Thailand/CU-H3628/2014  | KX151252                |
| A/Thailand/CU-H3632/2014  | KX151253                |
| A/Thailand/CU-B10114/2014 | KX151254                |
| A/Thailand/CU-C4666/2014  | KX151255                |
| A/Thailand/CU-B10032/2014 | KX151256                |

|                           |          |
|---------------------------|----------|
| A/Thailand/CU-B10033/2014 | KX151257 |
| A/Thailand/CU-B10044/2014 | KX151258 |
| A/Thailand/CU-B10126/2014 | KX151259 |
| A/Thailand/CU-B10172/2014 | KX151260 |
| A/Thailand/CU-B10174/2014 | KX151261 |
| A/Thailand/CU-B10180/2014 | KX151262 |
| A/Thailand/CU-A1058/2014  | KX151263 |
| A/Thailand/CU-B10185/2014 | KX151264 |
| A/Thailand/CU-B10207/2014 | KX151265 |
| A/Thailand/CU-C4844/2014  | KX151266 |
| A/Thailand/CU-A1070/2014  | KX151267 |
| A/Thailand/CU-A1105/2014  | KX151268 |
| A/Thailand/CU-B10405/2014 | KX151269 |
| A/Thailand/CU-B10578/2014 | KX151270 |
| A/Thailand/CU-B10652/2014 | KX151271 |
| A/Thailand/CU-B10658/2014 | KX151272 |
| A/Thailand/CU-B10888/2014 | KX151273 |
| A/Thailand/CU-B10909/2014 | KX151274 |
| A/Thailand/CU-H3658/2014  | KX151275 |
| A/Thailand/CU-C5062/2014  | KX151276 |
| A/Thailand/CU-A1205/2014  | KX151277 |
| A/Thailand/CU-B11070/2014 | KX151278 |
| A/Thailand/CU-C5149/2014  | KX151279 |
| A/Thailand/CU-C5169/2014  | KX151280 |
| A/Thailand/CU-A1282/2014  | KX151281 |
| A/Thailand/CU-B11233/2014 | KX151282 |
| A/Thailand/CU-B11291/2014 | KX151283 |
| A/Thailand/CU-C5263/2014  | KX151284 |
| A/Thailand/CU-A1344/2014  | KX151285 |
| A/Thailand/CU-B11363/2014 | KX151286 |
| A/Thailand/CU-B11375/2014 | KX151287 |
| A/Thailand/CU-B11422/2014 | KX151288 |
| A/Thailand/CU-A1434/2015  | KX151289 |
| A/Thailand/CU-B11495/2015 | KX151290 |
| A/Thailand/CU-B11463/2015 | KX151291 |
| A/Thailand/CU-B11556/2015 | KX151292 |
| A/Thailand/CU-B11612/2015 | KX151293 |
| A/Thailand/CU-B11606/2015 | KX151294 |
| A/Thailand/CU-B11669/2015 | KX151295 |
| A/Thailand/CU-C5474/2015  | KX151296 |
| A/Thailand/CU-B11672/2015 | KX151297 |
| A/Thailand/CU-B11699/2015 | KX151298 |
| A/Thailand/CU-B11761/2015 | KX151299 |

|                           |          |
|---------------------------|----------|
| A/Thailand/CU-C5535/2015  | KX151300 |
| A/Thailand/CU-B11797/2015 | KX151301 |
| A/Thailand/CU-B11841/2015 | KX151302 |
| A/Thailand/CU-B11844/2015 | KX151303 |
| A/Thailand/CU-B11877/2015 | KX151304 |
| A/Thailand/CU-C5736/2015  | KX151305 |
| A/Thailand/CU-B11984/2015 | KX151306 |
| A/Thailand/CU-C5866/2015  | KX151307 |
| A/Thailand/CU-B12167/2015 | KX151308 |
| A/Thailand/CU-B12418/2015 | KX151309 |
| A/Thailand/CU-B12591/2015 | KX151310 |
| A/Thailand/CU-B12604/2015 | KX151311 |
| A/Thailand/CU-B12653/2015 | KX151312 |
| A/Thailand/CU-B12974/2015 | KX151313 |
| A/Thailand/CU-B13002/2015 | KX151314 |
| A/Thailand/CU-B6372/2012  | KX151315 |
| A/Thailand/CU-B9280/2014  | KX151316 |
| A/Thailand/CU-B9297/2014  | KX151317 |
| A/Thailand/CU-H3640/2014  | KX151318 |
| A/Thailand/CU-B13202/2015 | KX151319 |
| A/Thailand/CU-B13274/2015 | KX151320 |
| A/Thailand/CU-B13508/2015 | KX151321 |
| A/Thailand/CU-C6326/2015  | KX151322 |
| A/Thailand/CU-B14522/2015 | KX151323 |
| A/Thailand/CU-B14530/2015 | KX151324 |
| A_Bangkok_INS3_681_2012   | CY176748 |
| A_Bangkok_INS424_2010     | CY071329 |
| A/Bangkok/INS425/2010     | CY071337 |
| A/Bangkok/INS426/2010     | CY071345 |
| A/Bangkok/INS427/2010     | CY071353 |
| A/Bangkok/INS428/2010     | CY071361 |
| A/Bangkok/INS477/2010     | CY096292 |
| A/Bangkok/INS478/2010     | CY096300 |
| A/Bangkok/INS479/2010     | CY096308 |
| A/Bangkok/INS480/2010     | CY096316 |
| A/Bangkok/INS481/2010     | CY096324 |
| A/Bangkok/INS482/2010     | CY096332 |
| A/Bangkok/INS483/2010     | CY096340 |
| A/Bangkok/INS484/2010     | CY098108 |
| A/Bangkok/INS485/2010     | CY096348 |
| A/Bangkok/INS486/2010     | CY098116 |
| A/Bangkok/INS487/2010     | CY098124 |
| A/Bangkok/INS488/2010     | CY098132 |

|                        |          |
|------------------------|----------|
| A/Bangkok/INS489/2010  | CY096356 |
| A/Bangkok/INS490/2010  | CY098140 |
| A/Bangkok/INS491/2010  | CY096364 |
| A/Bangkok/INS492/2010  | CY096372 |
| A/Bangkok/INS493/2010  | CY096380 |
| A/Bangkok/INS494/2010  | CY096388 |
| A/Bangkok/INS495/2010  | CY096396 |
| A/Bangkok/INS497/2010  | CY096404 |
| A/Bangkok/INS498/2010  | CY096412 |
| A/Bangkok/INS499/2010  | CY096420 |
| A/Bangkok/INS500/2010  | CY096428 |
| A/Bangkok/INS501/2010  | CY096436 |
| A/Bangkok/INS502/2010  | CY098148 |
| A/Bangkok/INS503/2010  | CY096444 |
| A/Bangkok/INS504/2010  | CY096452 |
| A/Bangkok/INS505/2010  | CY096460 |
| A/Bangkok/INS506/2010  | CY096468 |
| A/Bangkok/INS507/2010  | CY096476 |
| A/Bangkok/INS508/2010  | CY098156 |
| A/Bangkok/INS509/2010  | CY098164 |
| A/Bangkok/INS510/2010  | CY096484 |
| A/Bangkok/INS511/2010  | CY096492 |
| A/Bangkok/INS512/2010  | CY096500 |
| A/Bangkok/INS513/2010  | CY096508 |
| A/Bangkok/INS514/2010  | CY096515 |
| A/Bangkok/INS516/2010  | CY098555 |
| A/Bangkok/INS517/2010  | CY096523 |
| A/Bangkok/INS518/2010  | CY096531 |
| A/Bangkok/INS519/2010  | CY096539 |
| A/Bangkok/INS520/2010  | CY098565 |
| A/Bangkok/INS580/2010  | CY129760 |
| A/Bangkok/INS581/2010  | CY129768 |
| A/Bangkok/INS582/2010  | CY129776 |
| A/Bangkok/INS583/2010  | CY129784 |
| A/Bangkok/INS584/2010  | CY129792 |
| A/Bangkok/INS587/2010  | CY129816 |
| A/Bangkok/SIMI501/2009 | KM013714 |
| A/Bangkok/SIMI502/2010 | KM013715 |
| A/Bangkok/SIMI503/2010 | KM013716 |
| A/Bangkok/SIMI504/2010 | KM013717 |
| A/Bangkok/SIMI505/2010 | KM013718 |
| A/Bangkok/SIMI506/2010 | KM013719 |
| A/Bangkok/SIMI507/2009 | KM013720 |

|                           |          |
|---------------------------|----------|
| A/Bangkok/SIMI508/2010    | KM013721 |
| A/Bangkok/SIMI509/2010    | KM013722 |
| A/Bangkok/SIMI510/2010    | KM013723 |
| A/Bangkok/SIMI511/2010    | KM013724 |
| A/Khon Kaen/INS3_640/2010 | CY176468 |
| A/Khon Kaen/INS3_647/2010 | CY176524 |
| A/Khon Kaen/INS3_649/2012 | CY176540 |
| A/Khon Kaen/INS440/2010   | CY093058 |
| A/Khon Kaen/INS441/2010   | CY096068 |
| A/Khon Kaen/INS443/2010   | CY096076 |
| A/Khon Kaen/INS444/2010   | CY098204 |
| A/Khon Kaen/INS445/2010   | CY096084 |
| A/Khon Kaen/INS446/2010   | CY096092 |
| A/Khon Kaen/INS447/2010   | CY096100 |
| A/Khon Kaen/INS448/2010   | CY093066 |
| A/Khon Kaen/INS449/2010   | CY096108 |
| A/Khon Kaen/INS450/2010   | CY096116 |
| A/Khon Kaen/INS451/2010   | CY096124 |
| A/Khon Kaen/INS452/2010   | CY096132 |
| A/Khon Kaen/INS453/2010   | CY096140 |
| A/Khon Kaen/INS454/2010   | CY096148 |
| A/Khon Kaen/INS455/2010   | CY096156 |
| A/Khon Kaen/INS456/2010   | CY093074 |
| A/Khon Kaen/INS457/2010   | CY096164 |
| A/Khon Kaen/INS458/2010   | CY096172 |
| A/Khon Kaen/INS459/2010   | CY096180 |
| A/Khon Kaen/INS460/2010   | CY096188 |
| A/Khon Kaen/INS461/2010   | CY098100 |
| A/Khon Kaen/INS462/2010   | CY096196 |
| A/Khon Kaen/INS521/2010   | CY096547 |
| A/Khon Kaen/INS522/2010   | CY096555 |
| A/Khon Kaen/INS523/2010   | CY096563 |
| A/Khon Kaen/INS585/2010   | CY129800 |
| A/Khon Kaen/INS586/2010   | CY129808 |
| A/Khon Kaen/INS588/2010   | CY129824 |
| A/Nonthaburi/102/2009     | CY039988 |
| A/Thailand/104/2009       | GQ169381 |
| A/Thailand/C602/2010      | CY080309 |
| A/Thailand/CU-B2357/2010  | CY080301 |
| A/Thailand/CU-B5/2009     | GQ866953 |
| A/Thailand/CU-H1786/2010  | CY080325 |
| A/Thailand/CU-H1821/2010  | CY080341 |
| A/Thailand/CU-H2176/2010  | CY088803 |

|                                         |          |
|-----------------------------------------|----------|
| A/Thailand/CU-H2283/2010                | CY082965 |
| A/Thailand/CU-H2358/2010                | CY082966 |
| A/Thailand/CU-H2389/2010                | CY082967 |
| A/Thailand/CU-H2417/2010                | CY088832 |
| A/Thailand/CU-H2543/2010                | CY088840 |
| A/Thailand/CU-FS1/2014                  | KU051433 |
| A/Thailand/CU-FS2/2014                  | KU051441 |
| A/Thailand/H1255/2010                   | CY080317 |
| A/Thailand/H1818/2010                   | CY080333 |
| A/Thailand/NHRC430218/2014              | KJ889263 |
| A/Thailand/SirirajICRC_BKK_1/2010       | KF849751 |
| A/Thailand/SirirajICRC_CBI_2/2009       | KF849738 |
| A/Thailand/SirirajICRC_CBI_3/2009       | KF849739 |
| A/Thailand/SirirajICRC_CBI_4/2009       | KF849740 |
| A/Thailand/SirirajICRC_CBI_7/2009       | KF849741 |
| A/Thailand/SirirajICRC_CBI_8/2009       | KF849742 |
| A/Thailand/SirirajICRC_CBI_9/2009       | KF849743 |
| A/Thailand/SirirajICRC_NMA_1/2011       | KF849752 |
| A/Thailand/SirirajICRC_NMA_11/2011      | KF849761 |
| A/Thailand/SirirajICRC_NMA_12/2011      | KF849762 |
| A/Thailand/SirirajICRC_NMA_13/2011      | KF849763 |
| A/Thailand/SirirajICRC_NMA_14/2011      | KF849764 |
| A/Thailand/SirirajICRC_NMA_15/2011      | KF849765 |
| A/Thailand/SirirajICRC_NMA_16/2011      | KF849766 |
| A/Thailand/SirirajICRC_NMA_2/2011       | KF849753 |
| A/Thailand/SirirajICRC_NMA_3/2011       | KF849754 |
| A/Thailand/SirirajICRC_NMA_4/2011       | KF849755 |
| A/Thailand/SirirajICRC_NMA_5/2011       | KF849756 |
| A/Thailand/SirirajICRC_NMA_6/2011       | KF849757 |
| A/Thailand/SirirajICRC_NMA_7/2011       | KF849758 |
| A/Thailand/SirirajICRC_NMA_8/2011       | KF849759 |
| A/Thailand/SirirajICRC_NMA_9/2011       | KF849760 |
| A/Thailand/SirirajICRC_NSN_1/2010       | KF849749 |
| A/Thailand/SirirajICRC_NSN_3/2010       | KF849750 |
| A/Thailand/SirirajICRC_SEA-001(34)/2010 | KF849747 |
| A/Thailand/SirirajICRC_SEA-002(33)/2010 | KF849745 |
| A/Thailand/SirirajICRC_SEA-002(34)/2010 | KF849744 |
| A/Thailand/SirirajICRC_SEA-003(33)/2010 | KF849748 |
| A/Thailand/SirirajICRC_SEA-003(34)/2010 | KF849746 |
| A/Thailand/CU-H2548/2010                | CY089449 |
| A/Thailand/CU-H2698/2010                | CY089457 |
| A/Thailand/CU-H2911/2011                | CY089465 |
| A/Thailand/CU-H567/2009                 | CY074992 |

|                                |            |
|--------------------------------|------------|
| A/Thailand/CU-H572/2009        | CY075000   |
| A/Thailand/CU-H847/2009        | CY075008   |
| A/Thailand/CU-H88/2009         | HM446344   |
| A/Thailand/CU-H9/2009          | GQ866961   |
| A/Thailand/CU-H910/2009        | CY075016   |
| A/Thailand/CU-C1157/2010       | CY081157   |
| A/Thailand/CU-C161/2009        | CY074976   |
| A/Thailand/CU-H1222/2010       | CY074984   |
| A/Thailand/CU-B4148/2010       | CY089431   |
| A/Thailand/CU-B4339/2010       | CY089439   |
| A/Chanthaburi/38/2015          | EPI643493  |
| A/Nonthaburi/53/2015           | EPI643329  |
| A/Nonthaburi/52/2015           | EPI 643283 |
| A/Nonthaburi/59/2015           | EPI 643259 |
| A/Pathumthani/12/2015          | EPI636129  |
| A/Chanthaburi/11/2015          | EPI636091  |
| A/Nonthaburi/375/2014          | EPI565031  |
| A/Nonthaburi/2398/2014         | EPI 564983 |
| A/Nonthaburi/72/2013           | EPI552434  |
| A/Bangkok/374/2013             | EPI552432  |
| A/Song Khla/160/2013           | EPI552429  |
| A/Phuket/01/2013               | EPI 552427 |
| A/Phuket/316/2014              | EPI541523  |
| A/Bangkok/1792/2014            | EPI541517  |
| A/SUPHANBURI/234/2014          | EPI540902  |
| A/NONTHABURI/248/2014          | EPI540897  |
| A/Sukhothai/214/2014           | EPI 531877 |
| A/Chanthaburi/190/2014         | EPI 531836 |
| A/PRACHUAP KHIRI KHAN/332/2013 | EPI 529418 |
| A/Song Khla/139/2014           | EPI524286  |
| A/Chiang Rai/157/2013          | EPI 466936 |
| A/SONG KHLA/416/2012           | EPI 450281 |
| A/Surat Thani/16/2013          | EPI 439227 |
| A/Chiang Rai/312/2012          | EPI407400  |
| A/Phuket/294/2012              | EPI 407397 |
| A/Song Khla/3113/2012          | EPI407361  |
| A/Tak/327/2012                 | EPI406034  |
| A/Chiang Rai/312/2012          | EPI 406031 |
| A/Ayutthaya/283/2012           | EPI386005  |
| A/Nonthaburi/74/2012           | EPI379535  |
| A/SONG KHLA/40/2012            | EPI346512  |
| A/Song Khla/270/2011           | EPI332584  |
| A/Nonthaburi/78/2011           | EPI 331545 |

|                        |            |
|------------------------|------------|
| A/SONG KHLA/34/2011    | EPI 295512 |
| A/Thailand/742/2010    | EPI 295494 |
| A/Thailand/594/2010    | EPI 276899 |
| A/CHIANG RAI/226/2010  | EPI271972  |
| A/SAMUTPRAKAN/102/2010 | EPI 231481 |
| A/Surat Thani/563/2009 | EPI231343  |
| A/Ayutthaya/568/2009   | EPI 221043 |
| A/Thailand/2944/2009   | EPI179068  |

## **Influenza B**

| <b>Virus name</b>        | <b>Accession number</b> |
|--------------------------|-------------------------|
| B/Victoria/02/1987       | CY018759                |
| B/Yamagata/16/1988       | CY018767                |
| B/Yamanashi/166/1998     | CY019533                |
| B/Lee/40 1940            | DQ792899                |
| B/Russia/1969            | EF626638                |
| B/Shanghai/361/2002      | EF541477                |
| B/Malaysia/2506/2004     | CY040451                |
| B/Florida/4/2006 2006    | CY033878                |
| B/Brisbane/60/2008       | CY115153                |
| B/Wisconsin/01/2010      | CY115185                |
| B/Jiangsu/10/2003        | CY033846                |
| B/Johannesburg/3964/2012 | EPI406273               |
| B/Brisbane/33/2008       | CY149983                |
| B/England/393/2008       | EPI211560               |
| B/Victoria/304/2006      | AGX18593                |
| B/Uruguay/12/2008        | EPI172515               |
| B/FujianGulou/1272/2008  | EPI366582               |
| B/Singapore/19/2009      | EPI193057               |
| B/Argentina/R158/2010    | EPI301333               |
| B/Harbin/7/1994          | CY040443                |
| B/Sichuan/379/99         | AJ784087                |
| B/Bangladesh/3333/2007   | AFH58308                |
| B/Stockholm/12/2011      | EPI340833               |
| B/Bangkok/141/1994       | CY019677                |
| B/Bangkok/153/1990       | CY019613                |
| B/Bangkok/163/1990       | CY019621                |
| B/Bangkok/34/1999        | AY139056                |
| B/Bangkok/54/1999        | AY139055                |

|                                 |           |
|---------------------------------|-----------|
| B/Chantaburi/218/2003           | CY022223  |
| B/Thailand/SirirajBKK1/2012     | KF492944  |
| B/Thailand/SirirajBKK2/2012     | KF492945  |
| B/Thailand/SirirajBKK3/2012     | KF492946  |
| B/Thailand/SirirajFlu/0006/2012 | KF492952  |
| B/Thailand/SirirajFlu/007/2012  | KF492953  |
| B/Thailand/SirirajFlu/014/2012  | KF492960  |
| B/Thailand/SirirajRMSC1/2010    | KF492967  |
| B/Thailand/SirirajEA3604/2008   | KF492916  |
| B/Thailand/SirirajSI1335/2010   | KF492921  |
| B/Thailand/SirirajSI1648/2010   | KF492926  |
| B/Thailand/SirirajSI1659/2010   | KF492927  |
| B/Thailand/SirirajSI2117/2010   | KF492929  |
| B/Thailand/SirirajSI2210/2010   | KF492930  |
| B/Thailand/VIROAF3/2012         | KJ577167  |
| B/Thailand/VIROAF3CS/2012       | KJ848692  |
| B/Thailand/VIROAF4/2012         | KJ577175  |
| B/Bangkok/42/2015               | EPI644134 |
| B/Chanthaburi/315/2015          | EPI644118 |
| B/Nonthaburi/1/2015             | EPI636474 |
| B/Bangkok/22/2015               | EPI636306 |
| B/Nonthaburi/373/2014           | EPI565142 |
| B/Prachuap/374/2014             | EPI562680 |
| B/Nonthaburi/359/2014           | EPI562662 |
| B/SongKhla/322/2014             | EPI541764 |
| B/Phuket/317/2014               | EPI541759 |
| B/ChiangRai/318/2014            | EPI541756 |
| B/NongKhai/321/2014             | EPI541703 |
| B/CHIANG RAI/273/2014           | EPI541360 |
| B/PHUKET/266/2014               | EPI541349 |
| B/PRACHUAP/233/2014             | EPI541344 |
| B/CHANTHABURI/3046/2013         | EPI529350 |
| B/PHUKET/3073/2013              | EPI529344 |
| B/TAK/338/2013                  | EPI529336 |
| B/Tak/145/2014                  | EPI526088 |
| B/NongKhai/176/2014             | EPI526058 |
| B/Sakaeo/73/2014                | EPI520499 |
| B/Bangkok/132/2014              | EPI520496 |
| B/NongKhai/172/2013             | EPI465931 |
| B/ChiangRai/169/2013            | EPI465927 |
| B/SongKhla/1598/2013            | EPI465914 |

|                         |           |
|-------------------------|-----------|
| B/Phuket/151/2013       | EPI465899 |
| B/PHUKET/423/2012       | EPI450355 |
| B/NONGKAI/419/2012      | EPI450349 |
| B/CHIANGRAI/3518/2012   | EPI450334 |
| B/ChiangRai/13/2013     | EPI433135 |
| B/ChiangRai/15/2013     | EPI433126 |
| B/NongKhai/03/2013      | EPI431406 |
| B/PRACHUAP/446/2012     | EPI417388 |
| B/NONTHANURI/2465/2012  | EPI417373 |
| B/NONGKHAI/46/2012      | EPI417370 |
| B/NONGKAI/2433/2012     | EPI417368 |
| B/CHANTHABURI/2460/2012 | EPI417350 |
| B/BANGKOK/29/2012       | EPI417329 |
| B/Prachuap/78/2012      | EPI408663 |
| B/NongKhai/322/2012     | EPI406963 |
| B/Bangkok/282/2012      | EPI406956 |
| B/Chanthaburi/318/2012  | EPI406950 |
| B/SongKhla/85/2012      | EPI387729 |
| B/Phuket/86/2012        | EPI387716 |
| B/SONGKHLA/24/2012      | EPI379573 |
| B/NONTHABURI/45/2012    | EPI379552 |
| B/CHIANGRAI/50/2012     | EPI379518 |
| B/PHUKET/53/2012        | EPI379515 |
| B/CHIANGRAI/22/2012     | EPI379369 |
| B/NONTHABURI/54/2012    | EPI379361 |
| B/NONGKHAI/39/2012      | EPI379358 |
| B/CHANTHABURI/32/2012   | EPI379350 |
| B/Phuket/77/2012        | EPI378209 |
| B/NongKhai/67/2012      | EPI378206 |
| B/Tak/57/2012           | EPI378203 |
| B/ChiangRai/55/2012     | EPI378200 |
| B/Bangkok/271/2011      | EPI346961 |
| B/NONTHABURI/1766/2011  | EPI346107 |
| B/NONGKHAI/112/2011     | EPI346104 |
| B/SONGKHLA/43/2011      | EPI332672 |
| B/NONGKHAI/40/2011      | EPI332669 |
| B/SURATTHANI/29/2011    | EPI331536 |
| B/Chanthaburi/74/2011   | EPI331117 |
| B/Chanthaburi/73/2011   | EPI331114 |
| B/Thailand/820/2010     | EPI294862 |
| B/BANGKOK/495/2010      | EPI294188 |

|                          |           |
|--------------------------|-----------|
| B/ChiangRai/369/2010     | EPI278935 |
| B/SONGKHLA/236/2010      | EPI272005 |
| B/CHANTHABURI/218/2010   | EPI272003 |
| B/SONGKHLA/164/2010      | EPI272001 |
| B/NONGKHAI/332/2009      | EPI228261 |
| B/CHANTHABURI/329/2009   | EPI228259 |
| B/Thailand/1024/2008     | EPI176457 |
| B/Thailand/987/2008      | EPI176455 |
| B/Thailand/3622/2008     | EPI162318 |
| B/Thailand/3365/2008     | EPI162316 |
| B/Thailand/393/2008      | EPI161761 |
| B/Thailand/374/2008      | EPI161759 |
| B/Thailand/373/2008      | EPI161757 |
| B/Thailand/94/2007       | EPI157243 |
| B/Thailand/89/2007       | EPI157241 |
| B/Thailand/869/2007      | EPI157239 |
| B/Thailand/810/2007      | EPI157237 |
| B/Thailand/81/2007       | EPI157235 |
| B/Thailand/762/2007      | EPI157232 |
| B/Thailand/264/2007      | EPI157228 |
| B/Thailand/1406/2007     | EPI157226 |
| B/Phitsanulok/2053/2004  | EPI157161 |
| B/Thailand/416/2007      | EPI155718 |
| B/Thailand/400/2007      | EPI155716 |
| B/Thailand/CU-243/2006   | JX513136  |
| B/Thailand/CU-364/2008   | JX513144  |
| B/Thailand/CU-A585/2013  | KM100243  |
| B/Thailand/CU-A605/2014  | KM100244  |
| B/Thailand/CU-A615/2014  | KM100247  |
| B/Thailand/CU-A626/2014  | KM100248  |
| B/Thailand/CU-A645/2014  | KM100251  |
| B/Thailand/CU-B2201/2010 | JX512976  |
| B/Thailand/CU-B2271/2010 | JX512984  |
| B/Thailand/CU-B2320/2010 | JX512992  |
| B/Thailand/CU-B2372/2010 | JX513000  |
| B/Thailand/CU-B2390/2010 | JX513008  |
| B/Thailand/CU-B2432/2010 | JX513016  |
| B/Thailand/CU-B2504/2010 | JX513024  |
| B/Thailand/CU-B2660/2010 | JX513032  |
| B/Thailand/CU-B3153/2010 | JX513040  |
| B/Thailand/CU-B4504/2011 | JX513048  |

|                           |          |
|---------------------------|----------|
| B/Thailand/CU-B4585/2011  | JX513056 |
| B/Thailand/CU-B5522/2011  | JX513064 |
| B/Thailand/CU-B5671/2011  | JX513072 |
| B/Thailand/CU-B5734/2011  | JX513080 |
| B/Thailand/CU-B5910/2011  | JX513088 |
| B/Thailand/CU-B6078/2012  | JX513096 |
| B/Thailand/CU-B6096/2012  | JX513104 |
| B/Thailand/CU-B6148/2012  | KM100232 |
| B/Thailand/CU-B6240/2012  | KM100233 |
| B/Thailand/CU-B6257/2012  | KM100234 |
| B/Thailand/CU-B6975/2012  | KM100237 |
| B/Thailand/CU-B7215/2012  | KM100239 |
| B/Thailand/CU-B7337/2012  | KM100241 |
| B/Thailand/CU-B8813/2013  | KM100242 |
| B/Thailand/CU-B8925/2014  | KM100245 |
| B/Thailand/CU-B8999/2014  | KM100249 |
| B/Thailand/CU-B9017/2014  | KM100250 |
| B/Thailand/CU-B9034/2014  | KM100252 |
| B/Thailand/CU-C1262/2010  | JX513112 |
| B/Thailand/CU-C1451/2010  | JX513120 |
| B/Thailand/CU-C1768/2011  | JX513128 |
| B/Thailand/CU-C4555/2014  | KM100253 |
| B/Thailand/CU-H1400/2010  | JX513152 |
| B/Thailand/CU-H1896/2010  | JX513160 |
| B/Thailand/CU-H2132/2010  | JX513168 |
| B/Thailand/CU-H2584/2010  | JX513176 |
| B/Thailand/CU-H2738/2010  | JX513184 |
| B/Thailand/CU-H2933/2011  | JX513192 |
| B/Thailand/CU-H3002/2011  | JX513200 |
| B/Thailand/CU-H3052/2011  | JX513208 |
| B/Thailand/CU-H3313/2012  | KM100235 |
| B/Thailand/CU-H3349/2012  | KM100236 |
| B/Thailand/CU-H3456/2012  | KM100238 |
| B/Thailand/CU-H3496/2012  | KM100240 |
| B/Thailand/CU-H3591/2014  | KM100246 |
| B/Thailand/CU-H3620/2014  | KX151325 |
| B/Thailand/CU-C4610/2014  | KX151326 |
| B/Thailand/CU-B9455/2014  | KX151327 |
| B/Thailand/CU-B9693/2014  | KX151328 |
| B/Thailand/CU-B10007/2014 | KX151329 |
| B/Thailand/CU-B10030/2014 | KX151330 |

|                           |          |
|---------------------------|----------|
| B/Thailand/CU-A832/2014   | KX151331 |
| B/Thailand/CU-B10125/2014 | KX151332 |
| B/Thailand/CU-B10127/2014 | KX151333 |
| B/Thailand/CU-C4799/2014  | KX151334 |
| B/Thailand/CU-B10233/2014 | KX151335 |
| B/Thailand/CU-B10235/2014 | KX151336 |
| B/Thailand/CU-B10236/2014 | KX151337 |
| B/Thailand/CU-B10303/2014 | KX151338 |
| B/Thailand/CU-B10340/2014 | KX151339 |
| B/Thailand/CU-B10376/2014 | KX151340 |
| B/Thailand/CU-B10440/2014 | KX151341 |
| B/Thailand/CU-B10508/2014 | KX151342 |
| B/Thailand/CU-B10739/2014 | KX151343 |
| B/Thailand/CU-B10747/2014 | KX151344 |
| B/Thailand/CU-B10835/2014 | KX151345 |
| B/Thailand/CU-B11066/2014 | KX151346 |
| B/Thailand/CU-B11155/2014 | KX151347 |
| B/Thailand/CU-B11168/2014 | KX151348 |
| B/Thailand/CU-C5175/2014  | KX151349 |
| B/Thailand/CU-B11219/2014 | KX151350 |
| B/Thailand/CU-B11259/2014 | KX151351 |
| B/Thailand/CU-B11295/2014 | KX151352 |
| B/Thailand/CU-B11305/2014 | KX151353 |
| B/Thailand/CU-B11371/2014 | KX151354 |
| B/Thailand/CU-B11389/2014 | KX151355 |
| B/Thailand/CU-B11391/2014 | KX151356 |
| B/Thailand/CU-B11425/2014 | KX151357 |
| B/Thailand/CU-B11464/2015 | KX151358 |
| B/Thailand/CU-B11465/2015 | KX151359 |
| B/Thailand/CU-B11472/2015 | KX151360 |
| B/Thailand/CU-B11572/2015 | KX151361 |
| B/Thailand/CU-B11595/2015 | KX151362 |
| B/Thailand/CU-B11603/2015 | KX151363 |
| B/Thailand/CU-B11609/2015 | KX151364 |
| B/Thailand/CU-B11673/2015 | KX151365 |
| B/Thailand/CU-B11681/2015 | KX151366 |
| B/Thailand/CU-B11705/2015 | KX151367 |
| B/Thailand/CU-B11719/2015 | KX151368 |
| B/Thailand/CU-B11774/2015 | KX151369 |
| B/Thailand/CU-B11776/2015 | KX151370 |
| B/Thailand/CU-B11789/2015 | KX151371 |

|                           |          |
|---------------------------|----------|
| B/Thailand/CU-B11823/2015 | KX151372 |
| B/Thailand/CU-B11863/2015 | KX151373 |
| B/Thailand/CU-B11864/2015 | KX151374 |
| B/Thailand/CU-B11901/2015 | KX151375 |
| B/Thailand/CU-B11908/2015 | KX151376 |
| B/Thailand/CU-B12073/2015 | KX151377 |
| B/Thailand/CU-B12092/2015 | KX151378 |
| B/Thailand/CU-B12096/2015 | KX151379 |
| B/Thailand/CU-B12113/2015 | KX151380 |
| B/Thailand/CU-B12741/2015 | KX151381 |
| B/Thailand/CU-B12992/2015 | KX151382 |
| B/Thailand/CU-B12998/2015 | KX151383 |
| B/Thailand/CU-B13258/2015 | KX151384 |
| B/Thailand/CU-B13297/2015 | KX151385 |
| B/Thailand/CU-B13716/2015 | KX151386 |
| B/Thailand/CU-B13874/2015 | KX151387 |
| B/Thailand/CU-B13917/2015 | KX151388 |
| B/Thailand/CU-B14903/2015 | KX151389 |
| B/Thailand/CU-B14300/2015 | KX151390 |
| B/Thailand/CU-B14301/2015 | KX151391 |
| B/Thailand/CU-B14308/2015 | KX151392 |
| B/Thailand/CU-B14349/2015 | KX151393 |
