# Supplementary material for: Evolution of the neuraminidase gene of seasonal influenza A and B viruses in Thailand between 2010 and 2015
Source: PubMed Central journal article supplement (PMC5391933; doi:10.1371/journal.pone.0175655), 2017-04-14
Supplement: pone.0175655.s006.pdf [file pone.0175655.s006.pdf]

**S3 Table.** Summary of clinical data of 18 patients infected with NAI resistant seasonal influenza viruses infection in the center of excellence in clinical virology, 2009-2015

| <b>Viral strain</b>              | <b>Age</b> | <b>Gender</b> | <b>AA mutation</b> | <b>Clinical sign <sup>a</sup></b>                                       | <b>Underlying disease</b>                               | <b>Duration <sup>b</sup></b> | <b>LT<sup>c</sup></b> | <b>complication</b> | <b>Severity <sup>d</sup></b> |
|----------------------------------|------------|---------------|--------------------|-------------------------------------------------------------------------|---------------------------------------------------------|------------------------------|-----------------------|---------------------|------------------------------|
| <b>Influenza A/H1N1 seasonal</b> |            |               |                    |                                                                         |                                                         |                              |                       |                     |                              |
| B589                             | 43         | Male          | H275Y              | Fever, myalgia, rhinorrhea                                              | Grave's disease                                         | 1                            | 3                     | No                  | Moderate                     |
| H17                              | 34         | Female        | H275Y              | Fever, sore throat, productive cough, rhinorrhea, malaise               | No                                                      | 3                            | 2                     | No                  | Moderate                     |
| H223                             | 34         | Female        | H275Y              | Fever, sore throat, productive cough, rhinorrhea, myalgia               | Pregnancy, Allergy; shrimp, Hyperthyroid                | No                           | 3                     | No                  | Moderate                     |
| H565                             | 60         | Female        | H275Y              | Fever, non-productive cough, rhinorrhea, malaise, dizziness, vomiting   | Hypertension, Hepatitis B, Asthma, hypercholesterolemia | 3                            | 3                     | No                  | Moderate                     |
| <b>Influenza A/H1N1 pdm09</b>    |            |               |                    |                                                                         |                                                         |                              |                       |                     |                              |
| B6372                            | 19         | Male          | H275Y              | High fever, productive cough, rhinorrhea, malaise, myalgia              | Allergy rhinitis                                        | 1                            | 3                     | No                  | Moderate                     |
| B9280                            | 32         | Female        | H275Y              | Fever, sore throat, productive cough, rhinorrhea, myalgia, headache     | No                                                      | 3                            | 2                     | No                  | Moderate                     |
| B9297                            | 64         | Female        | H275Y              | Fever, productive cough, malaise                                        | No                                                      | 1                            | No                    | No                  | Mild                         |
| H3640                            | 4          | Male          | H275Y              | Fever, non-productive cough, rhinorrhea                                 | Acute lymphoblastic leukemia                            | 3                            | 31                    | Hypokalemia         | Moderate                     |
| <b>Influenza A/H3N2</b>          |            |               |                    |                                                                         |                                                         |                              |                       |                     |                              |
| H3435                            | 13         | Male          | I222V              | Fever, sore throat, non-productive cough, rhinorrhea, myalgia, headache | No                                                      | 3                            | 2                     | Sinusitis           | Moderate                     |
| <b>Influenza B</b>               |            |               |                    |                                                                         |                                                         |                              |                       |                     |                              |
| B10340                           | 9          | Male          | D197N              | Fever, myalgia, headache, vomiting, nausea                              | No                                                      | 2                            | No                    | No                  | Mild                         |
| B7337                            | 55         | Female        | A395E              | Fever, febrile illness                                                  | Diabetes Mellitus, Hypertension                         | 4                            | 4                     | No                  | Moderate                     |
| B5910                            | 50         | Male          | A395T              | Fever, sore throat, non-productive cough                                | No                                                      | No                           | No                    | No                  | Mild                         |
| B6148                            | 33         | Male          | A395T              | High fever, sore throat, productive cough, myalgia                      | No                                                      | 3                            | 7                     | No                  | Moderate                     |
| B5522                            | 7          | Female        | A395D              | High fever, non-productive cough, rhinorrhea                            | No                                                      | 2                            | No                    | No                  | Mild                         |

|        |    |      |       |                                                                                                    |                  |    |   |           |          |
|--------|----|------|-------|----------------------------------------------------------------------------------------------------|------------------|----|---|-----------|----------|
| B10236 | 38 | Male | A395V | Fever, non-productive cough, myalgia                                                               | No               | 3  | 3 | No        | Severe   |
| B2320  | 33 | Male | A395T | Fever, non-productive cough, malaise                                                               | Allergy rhinitis | No | 5 | No        | Moderate |
| H1400  | 6  | Male | A395T | High fever, cough with sputum, rhinorrhea                                                          | No               | 2  | 7 | Sinusitis | Moderate |
| H3002  | 7  | Male | A395D | High fever, non-productive cough, rhinorrhea, headache, vomiting, depress, loss appetite, diarrhea | No               | 4  | 5 | No        | Moderate |

<sup>a</sup> When patients were admitted to hospital

<sup>b</sup> duration from onset of illness to initiation of oseltamivir (days)

<sup>c</sup> Length of hospitalization (days)

<sup>d</sup> OPD cases = mild

Admit = moderate

ICU/O<sub>2</sub> = Severe
