# Supplementary material for: Evolution of the neuraminidase gene of seasonal influenza A and B viruses in Thailand between 2010 and 2015
Source: PubMed Central journal article supplement (PMC5391933; doi:10.1371/journal.pone.0175655), 2017-04-14
Supplement: pone.0175655.s007.pdf [file pone.0175655.s007.pdf]

**S4A Table.** Positively selected sites on the neuraminidase of influenza A/H1N1 pdm09 among strains isolated in Thailand, 2009-2015.

| <b>Codon</b> | <b>SLAC dN-dS</b> | <b>SLAC <i>p</i>-value</b> | <b>FEL dN-dS</b> | <b>FEL <i>p</i>-value</b> | <b>MEME <math>\omega^+</math></b> | <b>MEME <i>p</i>-value</b> |
|--------------|-------------------|----------------------------|------------------|---------------------------|-----------------------------------|----------------------------|
| 13           | 6.329             | 0.133                      | 3.959            | <b>0.039</b>              | >100                              | <b>0.056</b>               |
| 34           | 6.201             | 0.148                      | 4.239            | <b>0.057</b>              | >100                              | <b>0.078</b>               |
| 48           | 6.344             | 0.132                      | 4.27             | <b>0.074</b>              | >100                              | <b>0.098</b>               |
| 188          | 4.888             | 0.23                       | 3.542            | <b>0.059</b>              | >100                              | <b>0.079</b>               |
| 270          | 5.86              | 0.2                        | 3.981            | <b>0.093</b>              | >100                              | 0.118                      |
| 366          | 2.727             | 0.479                      | 1.531            | 0.62                      | >100                              | <b>0.009</b>               |
| 451          | 4.691             | 0.271                      | 2.776            | <b>0.098</b>              | >100                              | 0.124                      |
| 463          | 8.239             | <b>0.033</b>               | 5.886            | <b>0.013</b>              | >100                              | <b>0.000</b>               |

**S4B Table.** Positively selected sites on the neuraminidase of seasonal influenza A/H1N1 among strains isolated in Thailand, 2009-2015.

| <b>Codon</b> | <b>SLAC dN-dS</b> | <b>SLAC <i>p</i>-value</b> | <b>FEL dN-dS</b> | <b>FEL <i>p</i>-value</b> | <b>MEME <math>\omega^+</math></b> | <b>MEME <i>p</i>-value</b> |
|--------------|-------------------|----------------------------|------------------|---------------------------|-----------------------------------|----------------------------|
| 7            | -7.864            | 0.998                      | -27.072          | 0.084                     | >100                              | <b>0.012</b>               |
| 77           | 3.657             | <b>0.088</b>               | 11.702           | <b>0.079</b>              | >100                              | <b>0.036</b>               |
| 222          | 8.798             | <b>0.006</b>               | 33.293           | <b>0.006</b>              | >100                              | <b>0.01</b>                |
| 249          | 2.451             | 0.199                      | 7.726            | <b>0.074</b>              | >100                              | <b>0.097</b>               |
| 266          | 1.93              | 0.274                      | 9.57             | 0.121                     | >100                              | <b>0.045</b>               |
| 344          | 2.767             | 0.193                      | 9.633            | <b>0.055</b>              | >100                              | <b>0.075</b>               |
| 452          | 5.606             | <b>0.033</b>               | 19.616           | <b>0.018</b>              | >100                              | <b>0.024</b>               |

**S4C Table.** Positively selected sites on the neuraminidase of influenza A/H3N2 among strains isolated in Thailand

| <b>Codon</b> | <b>SLAC dN-dS</b> | <b>SLAC <i>p</i>-value</b> | <b>FEL dN-dS</b> | <b>FEL <i>p</i>-value</b> | <b>MEME <math>\omega^+</math></b> | <b>MEME <i>p</i>-value</b> |
|--------------|-------------------|----------------------------|------------------|---------------------------|-----------------------------------|----------------------------|
| 4            | -5.582            | 0.988                      | -3.225           | <b>0.047</b>              | >100                              | <b>0</b>                   |
| 43           | 3.88              | 0.179                      | 2.196            | <b>0.082</b>              | 41.261                            | <b>0.02</b>                |
| 93           | 4.092             | <b>0.078</b>               | 1.601            | <b>0.038</b>              | >100                              | <b>0.055</b>               |
| 141          | 3.263             | 0.166                      | 1.649            | <b>0.038</b>              | >100                              | <b>0.054</b>               |
| 150          | 2.369             | 0.214                      | 1.157            | <b>0.096</b>              | >100                              | 0.12                       |
| 181          | -0.529            | 0.87                       | -0.337           | 0.672                     | >100                              | <b>0</b>                   |
| 215          | 3.586             | <b>0.094</b>               | 1.72             | <b>0.039</b>              | >100                              | <b>0.056</b>               |
| 267          | 1.097             | 0.492                      | 0.221            | 0.87                      | 66.257                            | <b>0.023</b>               |
| 271          | 2.72              | 0.223                      | 1.264            | 0.106                     | >100                              | <b>0.009</b>               |
| 401          | 3.602             | <b>0.091</b>               | 1.53             | <b>0.049</b>              | >100                              | <b>0.068</b>               |
| 402          | 2.175             | 0.302                      | 1.059            | 0.137                     | >100                              | <b>0.088</b>               |
| 464          | 2.972             | 0.143                      | 1.562            | <b>0.032</b>              | >100                              | <b>0.001</b>               |
| 468          | 3.623             | <b>0.088</b>               | 1.837            | <b>0.032</b>              | >100                              | <b>0.046</b>               |

**S4D Table.** Positively selected sites on the neuraminidase of influenza B among strains isolated in Thailand

| Codon | SLAC dN-dS | SLAC <i>p</i> -value | FEL dN-dS | FEL <i>p</i> -value | IFEL dN-dS | IFEL <i>p</i> -value | MEME $\omega^+$ | MEME <i>p</i> -value |
|-------|------------|----------------------|-----------|---------------------|------------|----------------------|-----------------|----------------------|
| 15    | -          | -                    | -         | -                   | 0.313      | 0.024                | >100            | 0.005                |
| 27    | -          | -                    | -         | -                   | 0.321      | 0.018                | >100            | 0.04                 |
| 41    | -          | -                    | -         | -                   | 0.151      | 0.073                | >100            | 0.007                |
| 51    | -          | -                    | -         | -                   | 0.244      | 0.067                | >100            | 0.077                |
| 68    | -          | -                    | 0.162     | 0.096               | 0.228      | 0.078                | -               | -                    |
| 73    | 0.447      | 0.036                | 0.483     | 0.058               | -          | -                    | 14.964          | 0.033                |
| 106   | -          | -                    | 0.365     | 0.055               | 0.387      | 0.090                | 5.167           | 0.075                |
| 107   | -          | -                    | -         | -                   | 0.280      | 0.064                | >100            | 0.085                |
| 219   | -          | -                    | -         | -                   | 0.144      | 0.066                | >100            | 0.011                |
| 220   | -          | -                    | 0.113     | 0.051               | 0.216      | 0.027                | >100            | 0.092                |
| 248   | -          | -                    | 0.153     | 0.056               | 0.220      | 0.047                | -               | -                    |
| 358   | -          | -                    | 0.363     | 0.04                | 0.446      | 0.035                | >100            | 0.052                |
| 395   | 0.633      | 0.002                | 0.615     | 0.002               | 0.646      | 0.008                | >100            | 0.004                |
| 404   | 0.284      | 0.092                | 0.255     | 0.085               | 0.690      | 0.009                | >100            | 0.035                |
| 465   | -          | -                    | 0.237     | 0.093               | -          | -                    | >100            | 0.099                |

dN/dS or  $\omega$  is the ratio of synonymous to non-synonymous substitutions.

*p*-value from the SLAC, FEL, and MEME results (for positive selective pressure).

Statistically significant values are reported in bold.
